# Supplementary material
Source: PubMed Central journal article supplement (PMC6431162)
Supplement: pnas.1802876116.sapp.pdf [file pnas.1802876116.sapp.pdf]

# PNAS

[www.pnas.org](http://www.pnas.org)

Supporting Information for

**Seeking natural capital projects:  
Forest fires, haze and early-life exposure in Indonesia**

Jie-Sheng Tan-Soo and Subhrendu K Pattanayak

Address correspondence to: Subhrendu Pattanayak  
([subhrendu.pattanayak@duke.edu](mailto:subhrendu.pattanayak@duke.edu))

**This PDF file includes:**

Figs. S1 to S4

Tables S1 to S6

**Figure S1: One-way sensitivity analysis of societal net present values for the baseline scenario of using fires to clear land**

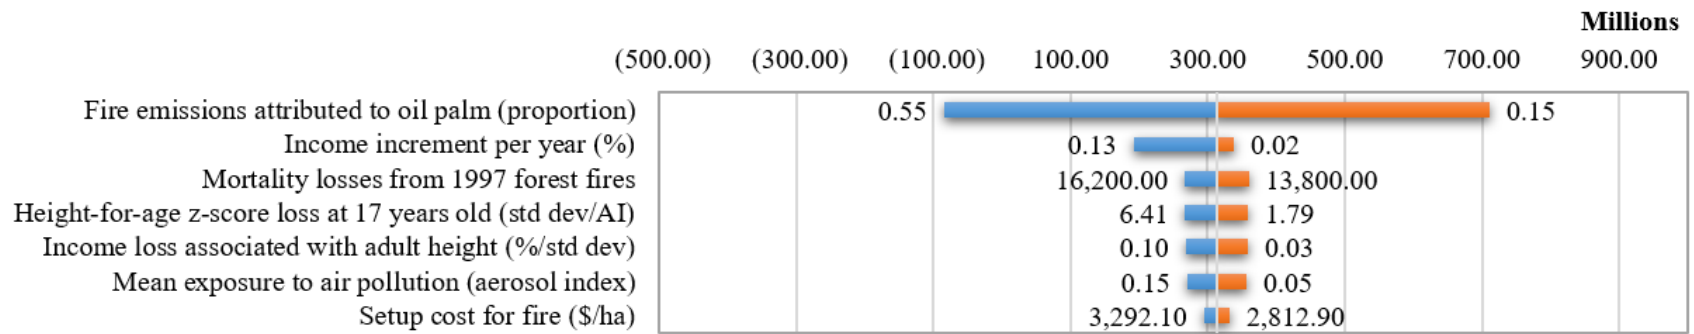

**Figure S2: Cumulative distribution of impact of mechanical land clearing on firm's profits**

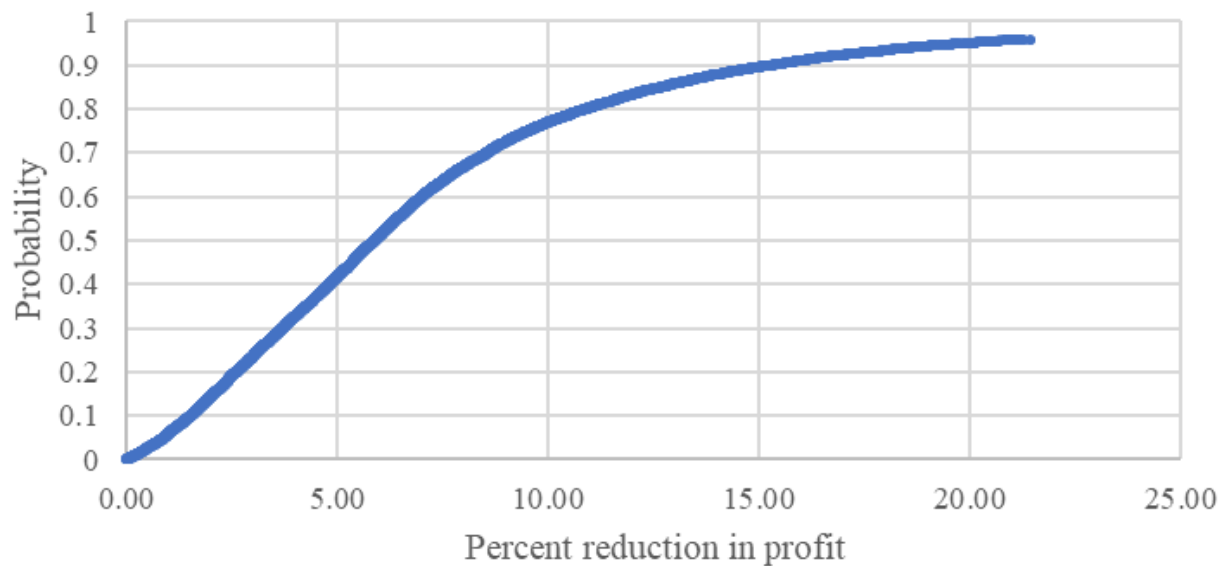

**Figure S3: One-way sensitivity analysis of improvements in societal net present value for a credibly enforced fire ban policy against baseline scenario**

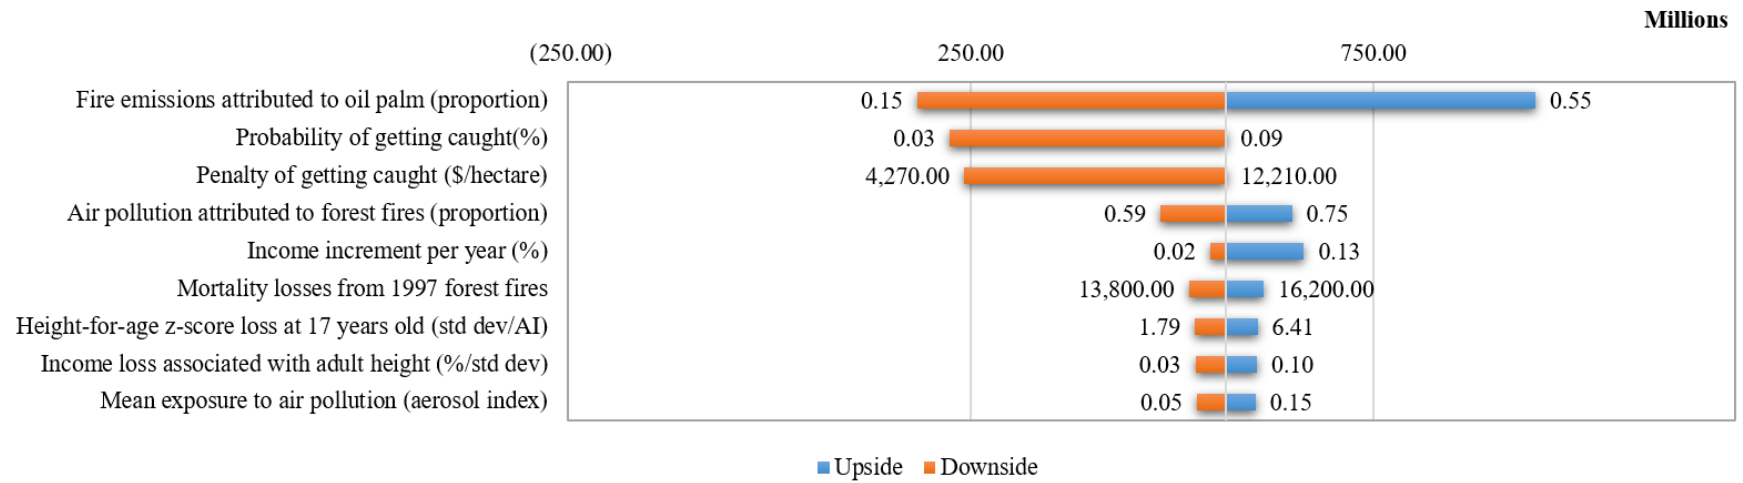

**Figure S4: One-way sensitivity analysis of improvements in societal net present value for a fire suppression policy against baseline scenario**

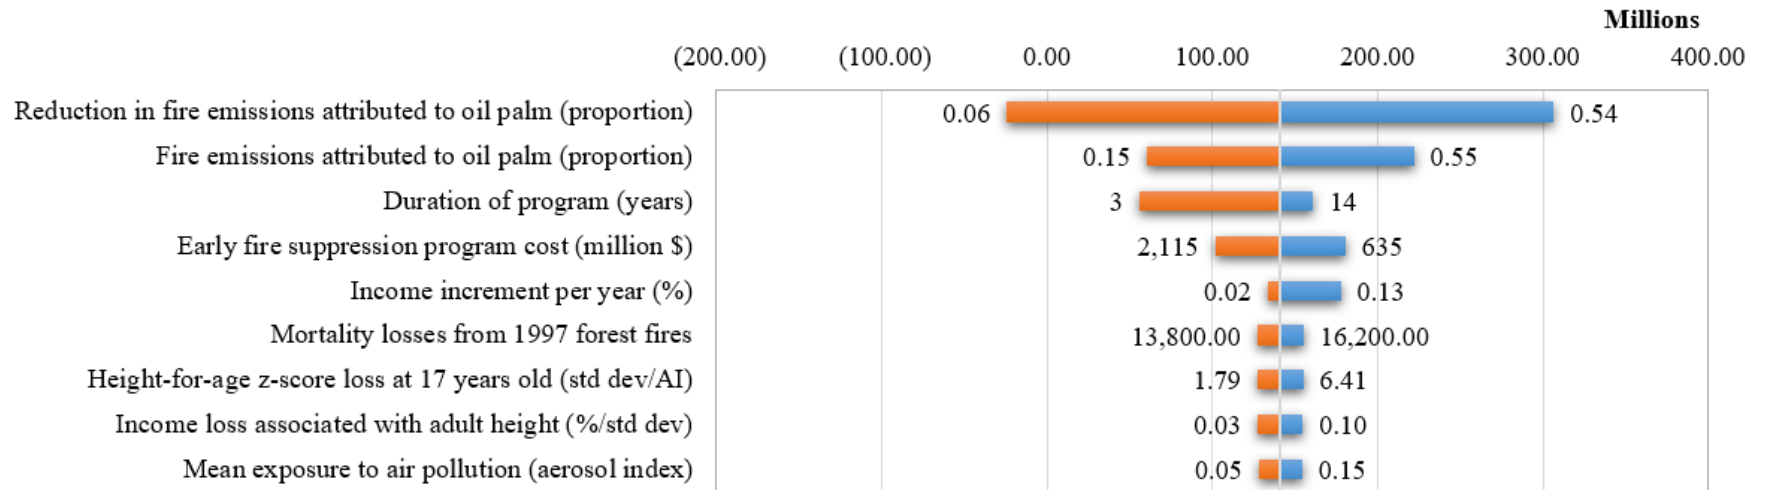

**Table S1: Descriptive statistics**

|                          | Variable                                                                             | Obs | Mean   | Std Dev | Min   | Max    |
|--------------------------|--------------------------------------------------------------------------------------|-----|--------|---------|-------|--------|
| Outcomes                 | Height-for-age z-score in second wave (year 2000)                                    | 564 | -1.79  | 1.24    | -4.71 | 2.41   |
|                          | Height-for-age z-score in third wave (year 2007)                                     | 558 | -1.58  | 1.11    | -4.08 | 2.2    |
|                          | Height-for-age z-score in fourth wave (year 2014)                                    | 558 | -1.69  | 0.90    | -4.08 | 1.58   |
| Environmental Covariates | Average aerosol index exposure from August to October 1997                           | 564 | 0.1    | 0.04    | 0     | 0.3    |
|                          | Average aerosol index exposure from August to October 1997 (prenatal exposure only)  | 564 | 0.08   | 0.05    | 0     | 0.3    |
|                          | Average aerosol index exposure from August to October 1997 (postnatal exposure only) | 564 | 0.02   | 0.04    | 0     | 0.19   |
|                          | Precipitation (mm)                                                                   | 564 | 21.36  | 16.55   | 0.63  | 138.32 |
|                          | Temperature anomaly (°C)                                                             | 564 | -0.2   | 0.26    | -0.82 | 0.91   |
|                          | Aerosol index 1998                                                                   | 564 | 0.07   | 0.01    | 0.00  | 0.10   |
|                          | Aerosol index 1999                                                                   | 564 | 0.07   | 0.01    | 0.05  | 0.13   |
| HH covariates            | Improved sanitation in 1997 (1 = yes; 0 = no)                                        | 564 | 0.72   | 0.45    | 0     | 1      |
|                          | Biomass fuel in 1997 (1 = yes; 0 = no)                                               | 564 | 0.46   | 0.5     | 0     | 1      |
| Parental covariates      | Father's height (cm)                                                                 | 564 | 160.57 | 12.4    | 15.6  | 181    |
|                          | Mother's height (cm)                                                                 | 564 | 150.35 | 7.79    | 15.4  | 166.4  |
|                          | Father at least high school (1 = yes; 0 = no)                                        | 564 | 0.26   | 0.44    | 0     | 1      |
|                          | Mother at least high school (1 = yes; 0 = no)                                        | 564 | 0.22   | 0.41    | 0     | 1      |

**Table S2: Results for all estimation models**

| VARIABLES                                            | (1)<br>Main<br>results  | (2)<br>Main<br>results | (3)<br>Later<br>years | (4)<br>Later<br>years | (5)<br>Outdoor<br>workers | (6)<br>Outdoor<br>workers | (7)<br>Placebo | (8)<br>Placebo |
|------------------------------------------------------|-------------------------|------------------------|-----------------------|-----------------------|---------------------------|---------------------------|----------------|----------------|
|                                                      | Height-for-age z-scores |                        |                       |                       |                           |                           |                |                |
| Aerosol Index (AI)                                   | -4.13**                 |                        | -4.03**               |                       | -4.10**                   |                           | 2.61           |                |
| AI(pre-natal)                                        |                         | -4.34**                |                       | -4.24**               |                           | -4.59**                   |                | -1.96          |
| AI(post-natal)                                       |                         | -3.66                  |                       | -3.54                 |                           | -2.94                     |                | 5.60           |
| AI*proportion of outdoor workers                     |                         |                        |                       |                       | -0.14                     |                           |                |                |
| AI(pre-natal)*proportion of outdoor workers          |                         |                        |                       |                       |                           | 0.14                      |                |                |
| AI(post-natal)*proportion of outdoor workers         |                         |                        |                       |                       |                           | -1.52                     |                |                |
| AI in 1998                                           |                         |                        | 0.36                  | 0.00                  |                           |                           |                |                |
| AI in 1999                                           |                         |                        | 6.08                  | 6.23                  |                           |                           |                |                |
| AI*year2000                                          | -0.15                   |                        | -0.21                 |                       | -0.34                     |                           | -6.67*         |                |
| AI*year 2007                                         | -1.28*                  |                        | -1.21*                |                       | -1.50**                   |                           | -4.80**        |                |
| AI(pre-natal)*year2000                               |                         | -0.06                  |                       | -0.12                 |                           | -0.03                     |                | -7.71*         |
| AI(pre-natal)*year2007                               |                         | -1.33*                 |                       | -1.26*                |                           | -1.45**                   |                | -6.28***       |
| AI(post-natal)*year2000                              |                         | -0.59                  |                       | -0.69                 |                           | -1.95                     |                | -4.55          |
| AI(post-natal)*year2007                              |                         | -1.02                  |                       | -0.92                 |                           | -1.80*                    |                | -1.74          |
| AI in 1998*year2000                                  |                         |                        | 2.85                  | 2.78                  |                           |                           |                |                |
| AI in 1998*year2007                                  |                         |                        | 4.87                  | 5.03                  |                           |                           |                |                |
| AI in 1999*year2000                                  |                         |                        | -0.33                 | -0.28                 |                           |                           |                |                |
| AI in 1999*year2007                                  |                         |                        | -3.02                 | -3.10                 |                           |                           |                |                |
| AI*proportion of outdoor workers*year2000            |                         |                        |                       |                       | -2.65*                    |                           |                |                |
| AI*proportion of outdoor workers*year2007            |                         |                        |                       |                       | -3.00***                  |                           |                |                |
| AI(pre-natal)*proportion of outdoor workers*year2000 |                         |                        |                       |                       |                           | -4.31**                   |                |                |

|                                                       |         |         |         |         |         |          |         |        |
|-------------------------------------------------------|---------|---------|---------|---------|---------|----------|---------|--------|
| AI(pre-natal)*proportion of outdoor workers*year2007  |         |         |         |         |         | -3.77*** |         |        |
| AI(post-natal)*proportion of outdoor workers*year2000 |         |         |         |         |         | 3.91**   |         |        |
| AI(post-natal)*proportion of outdoor workers*year2007 |         |         |         |         |         | 0.11     |         |        |
| Year 2000 (binary variable)                           | -0.08   | -0.08   | -0.62*  | -0.62*  | -0.01   | 0.00     | 0.04    | 0.05   |
| Year 2007 (binary variable)                           | 0.24*** | 0.24*** | 0.47*** | 0.47*** | 0.32*** | 0.32***  | 0.21*** | 0.22** |
| Observations                                          | 1,680   | 1,680   | 1,680   | 1,680   | 1,680   | 1,680    | 1,680   | 1,680  |
| R-squared                                             | 0.39    | 0.39    | 0.39    | 0.39    | 0.39    | 0.39     | 0.38    | 0.39   |

*Controls include father's and mother's height, father's and mother's educational level, household usage of improved sanitation and biomass fuel at early-life, and rainfall and temperature for same time period as AI.*

District fixed effects and birth-year-by-birth-month fixed effects included in all models

Standard errors are clustered multi-way at district level and birth-year-by-birth-month level

\*\*\* p<0.01, \*\* p<0.05, \* p<0.1



**Table S3: Distribution of cohort according to birth-years and -months**

| Birth Year | Month     | Number(%) | Birth Year | Month    | Number(%) |
|------------|-----------|-----------|------------|----------|-----------|
| 1997       | March     | 28(5)     | 1998       | January  | 27(5)     |
|            | April     | 31(5)     |            | February | 26(5)     |
|            | May       | 34(6)     |            | March    | 26(5)     |
|            | June      | 27(5)     |            | April    | 31(5)     |
|            | July      | 33(6)     |            | May      | 35(6)     |
|            | August    | 34(6)     |            | June     | 38(7)     |
|            | September | 28(5)     |            | July     | 35(6)     |
|            | October   | 30(5)     |            | August   | 34(6)     |
|            | November  | 31(5)     |            |          |           |
|            | December  | 36(6)     |            |          |           |

**Table S4: Results for household consumption mechanism check**

| <u>VARIABLES</u>                                             | <u>Household<br/>consumption<br/>per capita<br/>(rupiahs)</u> |
|--------------------------------------------------------------|---------------------------------------------------------------|
| Survey administered<br>after 1997 fires (1 = yes,<br>0 = no) | 1,306.435<br>(0.713)                                          |
| Urban                                                        | -1,015.473<br>(0.551)                                         |
| Constant                                                     | 12,988.647***<br>(0.000)                                      |
| Observations                                                 | 445                                                           |
| District fixed effects                                       | Y                                                             |
| R-squared                                                    | 0.003                                                         |

Standard errors clustered at district level,  
p-values in parentheses

\*\*\* p<0.01, \*\* p<0.05, \* p<0.1

**Table S5: List of parameters used in cost-benefit analysis**

| Parameter                                                 | Symbol                      | Base Value       | Min                                          | Max     | Distribution |                                                                |
|-----------------------------------------------------------|-----------------------------|------------------|----------------------------------------------|---------|--------------|----------------------------------------------------------------|
| Value of statistical life                                 | <i>VSL</i>                  | US\$158,400      | 79,200                                       | 250,800 | Uni          | OECD (2012); US EPA, World Bank Statistical Database           |
| Air pollution attributed to forest fires                  | <i>AP<sub>FF</sub></i>      | 0.6              | 0.57                                         | 0.77    |              | Authors' calculations                                          |
| Forest fires emissions attributed to oil palm plantations | <i>FFE<sub>OP</sub></i>     | 0.30             | 0.1                                          | 0.6     |              | Marlier et al. (2015)                                          |
| Mortality losses from 1997 forest fires                   | <i>Mort</i>                 | 15,000           | 13,500                                       | 16,500  |              | Tacconi (2016)                                                 |
| Plantation setup cost for fire-clearing (\$/ha)           | <i>SP<sub>f</sub></i>       | 3,053            | 2,753                                        | 3,352   |              | Butler et al (2009), Rotheli, 2007), authors' estimates        |
| Plantation setup cost for mechanical-clearing (\$/ha)     | <i>SP<sub>m</sub></i>       | 3,816            | 3,441                                        | 4,190   |              | Butler et al (2009), Rotheli, 2007),                           |
| Indonesians in prenatal stage during Aug-Oct 1997         | <i>Born</i>                 | 1.1 million      | N.A.                                         |         |              | Indonesian 2010 census                                         |
| Average blue-collar annual wage                           | <i>Wage</i>                 | US\$860          | 774                                          | 946     | Uni          | Indonesian Statistical Department (2014 figures)               |
| Annual wage increment                                     | <i>Inc</i>                  | 2%               | 0%                                           | 15%     |              | Indonesian Statistical Department                              |
| Mechanical cost of land clearing                          | <i>Clear<sub>Mech</sub></i> | US\$595/hectare  | 199                                          | 990     |              | Tacconi (2007); Simorangkir (2007); Guyon & Simorangkir (2002) |
| Fire cost of land clearing                                | <i>Clear<sub>Fire</sub></i> | US\$200/hectare  | 82                                           | 320     |              | Guyon & Simorangkir (2002); Simorangkir (2007)                 |
| Ecological cost of mechanical land clearing               | <i>Eco</i>                  | US\$57/hectare   | 33                                           | 80      |              | Medjibe & Putz (2012)                                          |
| Impact of AI on HAZ at 17 years old                       | <i>HAZ<sub>AI</sub></i>     | 4.1 std dev/AI   | 4.1(1.8)^                                    |         |              | Normal                                                         |
| Mean exposure to AI at early-life                         | <i>AI</i>                   | 0.1              | 0.1(0.04)^                                   |         |              |                                                                |
| Income loss associated with adult HAZ                     | <i>Wage<sub>HAZ</sub></i>   | 6%/std dev       | 2%                                           | 11%     | Uni          | Victora et al. (2008), Schultz (2002)                          |
| Oil palm plantations from 1997 fires                      | <i>OP</i>                   | 100,000 hectares | N.A.                                         |         | Uni          | Wicke et al. (2011)                                            |
| Setup period                                              | <i>years</i>                | 8 years          |                                              |         |              | Butler, Koh, and Ghazoul (2009)                                |
| Oil palm operating costs and revenue                      | <i>OP<sub>Cost</sub></i>    | Various          | High- and low-yield scenarios in cited study |         | Uni          | Butler, Koh, and Ghazoul (2009)                                |
|                                                           | <i>OP<sub>Rev</sub></i>     |                  |                                              |         |              |                                                                |
| Social discount rate (%)                                  | <i>DR</i>                   | 8%               | 5%                                           | 10%     | Uni          | Irawan & Tacconi (2016); ADB (2013)                            |
| Cost of early-fire detection system (million \$)          | <i>EF</i>                   | US\$540 million  | 450                                          | 2300    |              | Indonesian government                                          |
| Annual cost of enforcement of fire-ban (million \$)       | <i>FB</i>                   | US\$29 million   | 20                                           | 50      |              | Indonesia government                                           |
| Shelf-life of early-fire detection system (years)         | <i>life</i>                 | 7 years          | 2                                            | 15      |              | Authors' estimates                                             |
| Impact of haze pollution on tourism (\$)                  | <i>tour</i>                 | US\$114 million  | 88                                           | 140     |              |                                                                |

|                                                          |             |                    |                    |                 |     |                                                                           |
|----------------------------------------------------------|-------------|--------------------|--------------------|-----------------|-----|---------------------------------------------------------------------------|
| Impact of haze pollution on transportation (\$)          | <i>tp</i>   | US\$33 million     | 23                 | 42              |     | Glover & Jessup (1999); BAPENDAS-ADB (1999); Adapated from Tacconi (2003) |
| Penalties for firms caught using fire (\$/hectare)       | <i>pen</i>  | US\$15,000/hectare | 300                | 50,000          |     | Authors' estimates                                                        |
| Probability of getting caught for using fires            | <i>cgt</i>  | 0.05               | 0                  | 0.3             |     | Recent court judgements                                                   |
| Risk averseness of firms in response to fire enforcement | <i>risk</i> | 1 (risk neutral)   | 0.1 (risk adverse) | 3 (risk taking) | Uni | Authors' estimates                                                        |

^ Displayed as mean and standard deviation in parentheses for parameters in normal distribution

**Table S6: Equations used in cost-benefit analysis**

|                                                                |                                                                                                                                                                                                                                                |
|----------------------------------------------------------------|------------------------------------------------------------------------------------------------------------------------------------------------------------------------------------------------------------------------------------------------|
| <b>Private firm profits</b>                                    | Revenue of oil-palm plantations – Costs of plantations (land clearing, set-up, maintenance)                                                                                                                                                    |
| <b>Net social benefits</b>                                     | Avoided health costs (mortality, morbidity) + avoided non-health costs (tourism, transportation) – private firm profits                                                                                                                        |
| <b>Net social benefits (suppression policy)</b>                | Avoided health costs (mortality, morbidity) + avoided non-health costs (tourism, transportation) – private firm profits – Program costs                                                                                                        |
| <b>Net social benefits (enforcement policy)</b>                | Avoided health costs (mortality, morbidity) + avoided non-health costs (tourism, transportation) – private firm profits – Program costs                                                                                                        |
| <b>Individual components (Costs/benefits)</b>                  | <b>Equations</b>                                                                                                                                                                                                                               |
| Land clearing cost (mechanical)                                | $(Clear_{Mech} + Eco) \cdot OP$                                                                                                                                                                                                                |
| Land clearing cost (fire)                                      | $(Clear_{Fire}) \cdot OP$                                                                                                                                                                                                                      |
| Setup cost (mechanical)                                        | $\frac{OP}{years} \cdot SP_m \left[ \frac{\left(1 - \left(\frac{1}{1-DR}\right)\right)}{\left(1 - \left(\frac{1}{1-DR}\right)^{years}\right)} \right]$                                                                                         |
| Setup cost (fire)                                              | $\frac{OP}{years} \cdot SP_f \left[ \frac{\left(1 - \left(\frac{1}{1-DR}\right)\right)}{\left(1 - \left(\frac{1}{1-DR}\right)^{years}\right)} \right]$                                                                                         |
| Mortality cost                                                 | $AP_{FF} \cdot FFE_{OP} \cdot VSL \cdot Mort$                                                                                                                                                                                                  |
| Loss-of-income                                                 | $AP_{FF} \cdot FFE_{OP} \cdot Born \cdot HAZ_{AI} \cdot AI \cdot \left[ \left( \sum_{t=21}^{35} \frac{Wage \cdot (1 + Inc)^{t-21}}{(1 + DR)^t} \right) + \left( \sum_{t=36}^{58} \frac{Wage \cdot (1 + Inc)^{15}}{(1 + DR)^t} \right) \right]$ |
| Tourism                                                        | $AP_{FF} \cdot FFE_{OP} \cdot Tour$                                                                                                                                                                                                            |
| Transportation                                                 | $AP_{FF} \cdot FFE_{OP} \cdot Tp$                                                                                                                                                                                                              |
| Annual cost of early-fire detection                            | $EF \cdot \left[ \frac{\left(1 - \left(\frac{1}{1-DR}\right)\right)}{\left(1 - \left(\frac{1}{1-DR}\right)^{life}\right)} \right]$                                                                                                             |
| Proportion reduction in using fires in response to enforcement | $1 - risk^{\frac{(cgt*pen)}{(Clear_{Mech}+Eco-Clear_{Fire})}} \cdot \left(1 - \frac{(cgt * pen)}{(Clear_{Mech} + Eco - Clear_{Fire})}\right)$                                                                                                  |
